# Supplementary material for: Diverse proinflammatory response in pharyngeal epithelial cells upon interaction with Neisseria meningitidis carriage and invasive isolates
Source: Springer Nature journal article supplement (doi:10.1186/s12879-024-09186-3), 2024-03-06
Supplement: MOESM1 [file 26826006]

a)

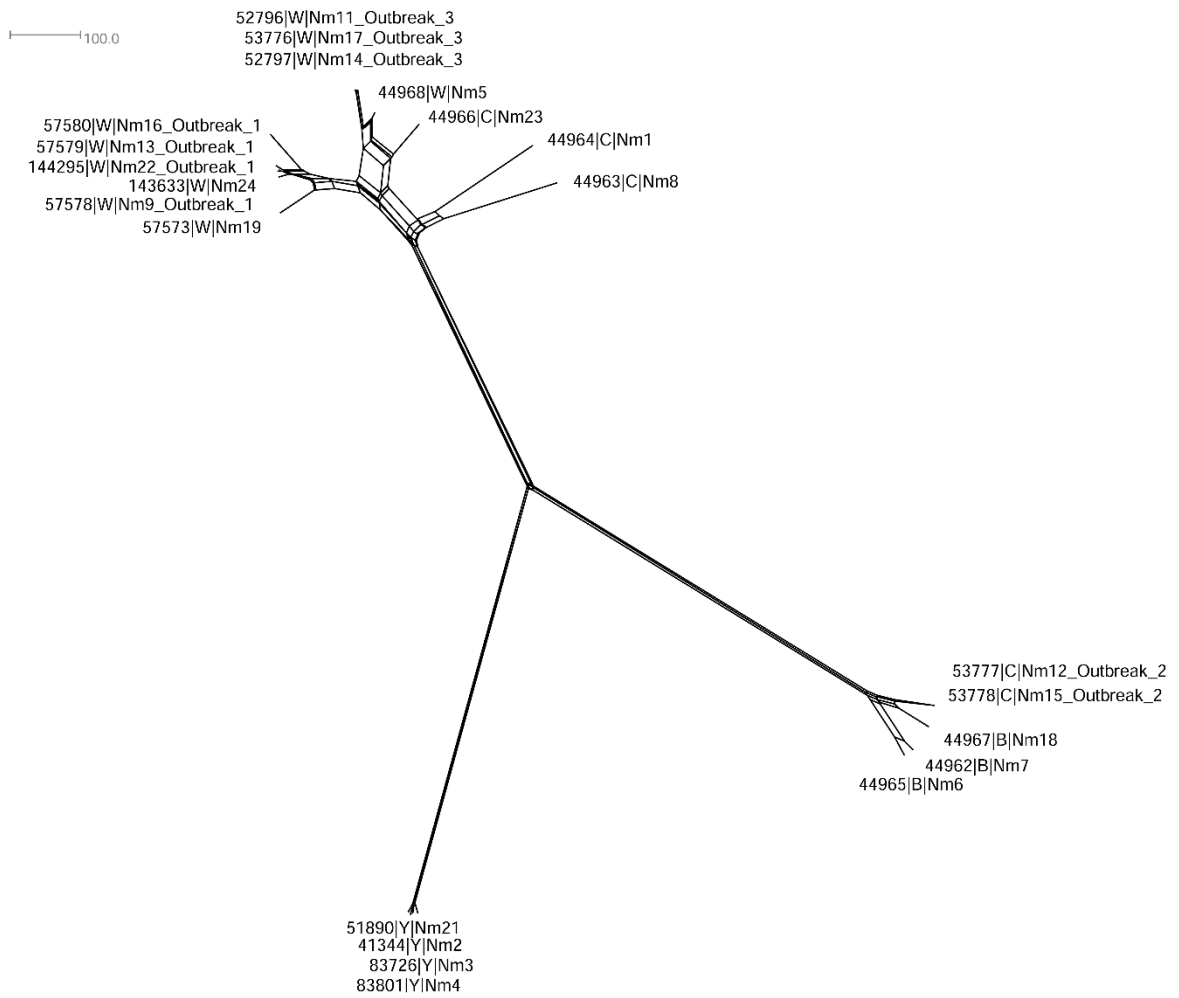

b)

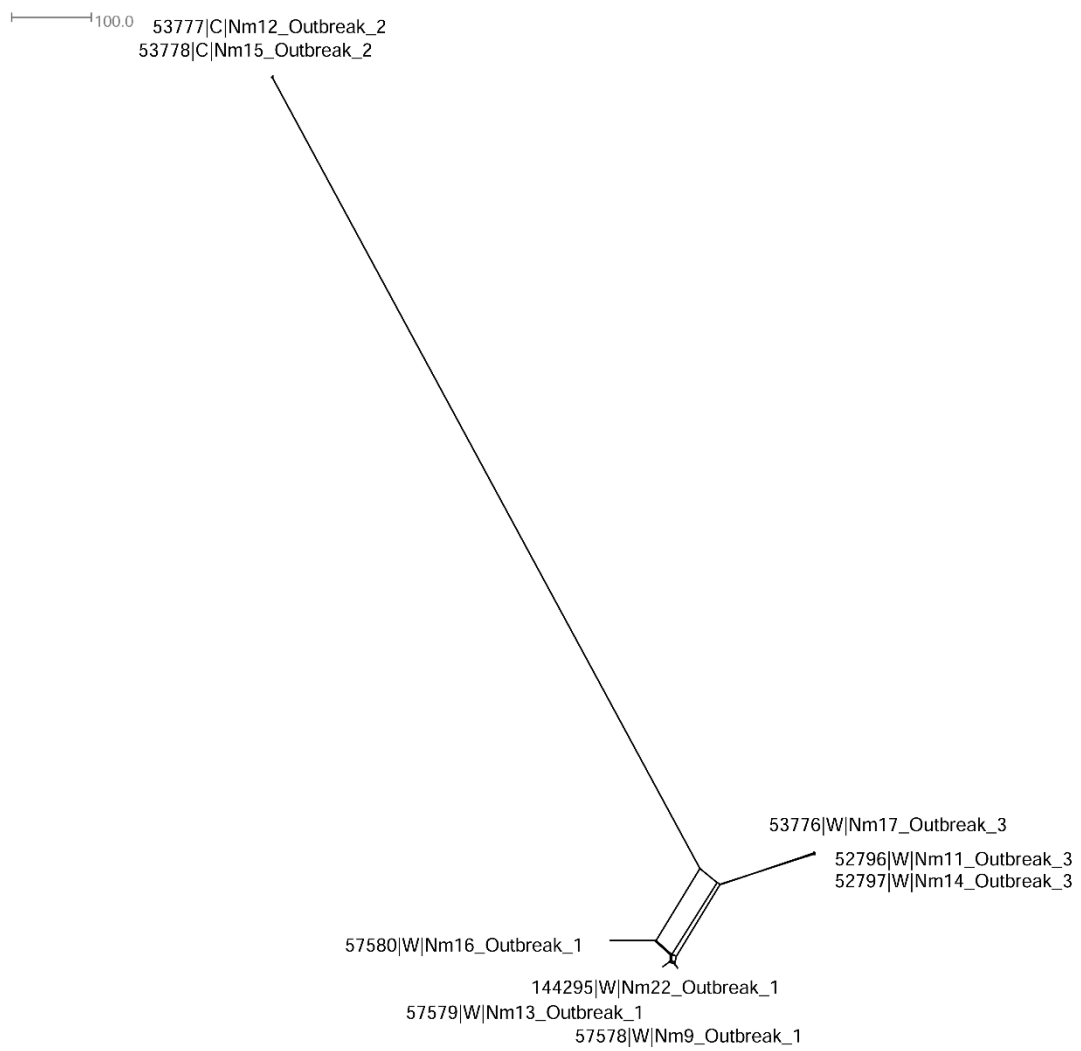

Supplementary Figure 1. *Neisseria meningitidis* genome comparison. NeighborNet network showing the genomic relatedness of a) all isolates and b) outbreak isolates in 1,422 core loci of *Neisseria meningitidis* v2 (Jolley KA, Bray JE, Maiden MCJ. Open-access bacterial population genomics: BIGSdb software, the PubMLST.org website and their applications. Wellcome Open Res. 2018;3:124). PubMLST ID, capsule group, alias and outbreak designation (if any) is shown for each node.
