# Supplementary material for: Diverse proinflammatory response in pharyngeal epithelial cells upon interaction with Neisseria meningitidis carriage and invasive isolates
Source: Springer Nature journal article supplement (doi:10.1186/s12879-024-09186-3), 2024-03-06
Supplement: MOESM2 [file 26826006]

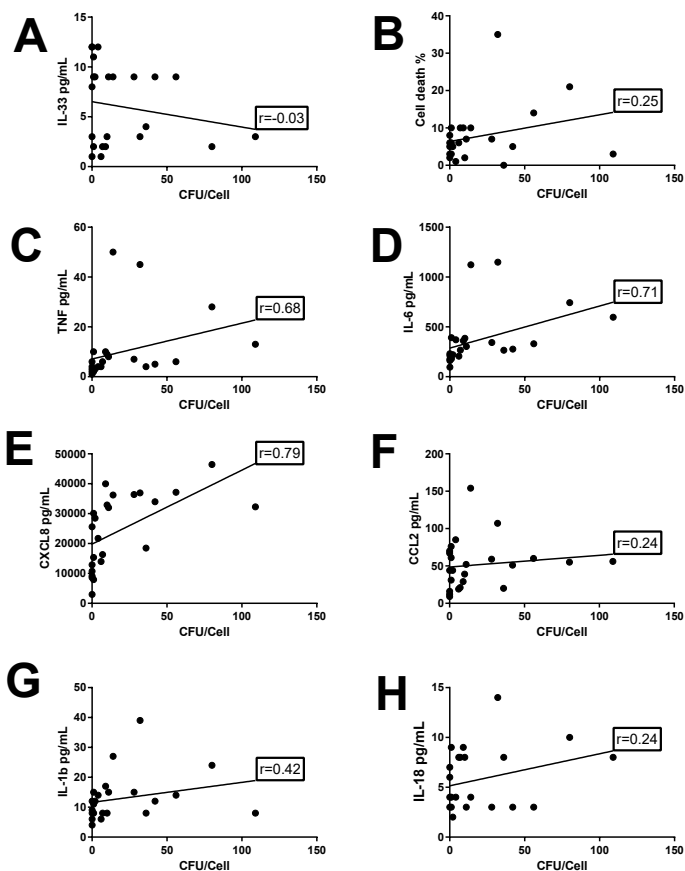

**Supplementary figure 2.** Correlation graphs for adhesion vs A: IL-33, B: cell death, C: TNF, D: IL-6, E: CXCL8, F: CCL2, G: IL-1b and H: IL-18 for all isolates included in the study.
